# A high-quality reference panel reveals the complexity and distribution of structural genome changes in a human population

Jayne Y. Hehir-Kwa<sup>1,\*</sup>, Tobias Marschall<sup>2,3,\*</sup>, Wigard P. Kloosterman<sup>4,\*</sup>, Laurent C. Francioli<sup>4,5</sup>, Jasmijn A. Baaijens<sup>6</sup>, Louis Dijkstra<sup>6,7,8</sup>, Abdel Abdellaoui<sup>9</sup>, Vyacheslav Koval<sup>10</sup>, Djie Tjwan Thung<sup>1</sup>, René Wardenaar<sup>11,12</sup>, Bradley Coe<sup>13</sup>, Patrick Deelen<sup>14</sup>, Joep de Ligt<sup>5</sup>, Eric-Wubbo Lameijer<sup>15</sup>, Freerk van Dijk<sup>14,15</sup>, Fereydoun Hormozdiari<sup>13,16</sup>, Evan E. Eichler<sup>13</sup>, Paul I.W. de Bakker<sup>4,17</sup>, Morris A. Swertz<sup>15</sup>, Cisca Wijmenga<sup>14,15</sup>, Gert-Jan B. van Ommen<sup>18</sup>, P. Eline Slagboom<sup>19</sup>, Dorret I. Boomsma<sup>6</sup>, The Genome of the Netherlands Consortium<sup>20</sup>, Alexander Schönhuth<sup>6,#</sup>, Kai Ye<sup>21,#</sup>, Victor Guryev<sup>11,#</sup>

<sup>1</sup> Department of Human Genetics, Donders Institute, Radboud University Medical Center, Nijmegen, 6525GA, The Netherlands.

<sup>2</sup> Center for Bioinformatics, Saarland University , 66123 Saarbrücken, Germany

<sup>3</sup> Max-Planck-Institute for Informatics, 66123 Saarbrücken, Germany

<sup>4</sup> Center for Molecular Medicine, Division Biomedical Genetics, University Medical Center Utrecht, Utrecht, 3584 CG, The Netherlands

<sup>5</sup> Analytic and Translational Genetics Unit, Massachusetts General Hospital, Boston, MA02114; The Broad Institute, Cambridge, MA02142

<sup>6</sup> Life Sciences Group, Centrum Wiskunde & Informatica, Amsterdam, 1098XG, The Netherlands

<sup>7</sup> Computational Science Lab, University of Amsterdam, Amsterdam, 1098XG, The Netherlands

<sup>8</sup> Department of High Performance Computing, ITMO University, Saint Petersburg, 197101, Russia

<sup>9</sup> Department of Biological Psychology, VU University Amsterdam, Amsterdam, 1081BT, The Netherlands

<sup>10</sup> Leiden Academic Centre for Drug Research, Leiden University, Leiden 2333CC, The Netherlands.

<sup>11</sup> European Research Institute for the Biology of Ageing, University of Groningen, University Medical Center Groningen, Groningen, 9713AD, The Netherlands

<sup>12</sup> Groningen Bioinformatics Centre, University of Groningen, 9747 AG Groningen, The Netherlands

<sup>13</sup> Department of Genome Sciences, University of Washington, Seattle, 98105, USA

<sup>14</sup> Department of Genetics, University of Groningen, University Medical Center Groningen, Groningen, 9700RB, The Netherlands

<sup>15</sup> Genomics Coordination Center, University of Groningen, University Medical Center Groningen, Groningen, 9700RB, The Netherlands

<sup>16</sup> Department of Biochemistry and Molecular Medicine, University of California Davis, USA.

<sup>17</sup> Department of Epidemiology, Julius Center for Health Sciences and Primary Care, University Medical Center Utrecht, Utrecht, 3584CG, The Netherlands

<sup>18</sup> Department of Human Genetics, Leiden University Medical Center, Leiden, 2300RC, The Netherlands

<sup>19</sup> Department of Medical Statistics and Bioinformatics, Leiden University Medical Center, Leiden, 2300RC, The Netherlands

<sup>20</sup> A complete list of consortium authors appears at the end of this article

<sup>21</sup> The Genome Institute, Washington University, St. Louis, MO 63108, USA

\* These authors contributed equally

# These authors contributed equally

### **Corresponding Author:**

Victor Guryev  
European Research Institute for the Biology of Ageing, University of Groningen, University Medical Center Groningen, Groningen, 9713AD, The Netherlands  
E-mail: v.guryev@umcg.nl

## ABSTRACT

Structural variation (SV) represents a major source of differences between individual human genomes and has been linked to disease phenotypes. However, current studies on SVs have failed to provide a global view of the full spectrum of SVs and to integrate them into reference panels of genetic variation.

Here, we analyzed 769 individuals from 250 Dutch families, whole-genome sequenced at an average coverage of 14.5x, and provide a haplotype-resolved map of 1.9 million genome variants across 9 different variant classes, including novel forms of complex indels and retrotransposition-mediated insertions of mobile elements and processed RNAs. A large proportion of the structural variants (36%) were discovered in the size range of 21 – 100bp, a size range which remains under reported in many studies. Furthermore, we detected 4 megabases of novel sequence, extending the human pangenome with 11 new active transcripts. Finally, we show 191 known, trait-associated SNPs to be in strong linkage disequilibrium with a structural variant and demonstrate that our panel facilitates accurate imputation of SVs into unrelated individuals, which is essential for future genome-wide association studies.

## INTRODUCTION

Comprehensive catalogs of genetic variation are fundamental building blocks in studies of population history, variant formation and variant-phenotype association. To obtain insights in ancestry and linkage disequilibrium of polymorphic sites it is imperative that such catalogs are haplotype-resolved (phased). Crucial improvements in accuracy and power can be achieved through population-specific panels<sup>1,2</sup>. However, current reference panels only contain single nucleotide polymorphisms (SNPs), insertions and deletions of up to 20bp in length (indels) but only very limited number of structural variants (SVs) larger than 20bp in size<sup>3,4</sup>. There is ample evidence that SV's play a major role in evolution and disease<sup>5-10</sup>. Therefore, despite posing substantial technical and methodological challenges with respect to discovery, genotyping and phasing of the variants in comparison to SNPs and small indels, the integration of SVs into reference panels is crucial for a broad spectrum of studies<sup>11,12</sup>.

Recently several population-scale sequencing projects have been undertaken aimed at capturing global genetic diversity<sup>13-16</sup>. In addition, a number of projects have focused on single populations attempting to capture the genetic variability of sociologically and/or historically coherent groups of people for specific variant types<sup>16-19</sup>. For example the UK10K project, which aims at capturing rare variants, comprising SNPs, indels and large deletions used ~7x whole-genome and ~80x whole-exome sequencing of nearly 10,000 individuals<sup>18</sup>. A similar subset of variant types are included in the Malay and the Danish genome sequencing projects which both use medium coverage (30-50x), focusing on rare variants that characterize the population<sup>19</sup>, *de novo* variants and the assembly of novel sequence<sup>17</sup>.

One of the primary goals of the Genome of the Netherlands (GoNL)<sup>1,20</sup> project was to assist a broad range of GWAS (Genome-Wide Association Studies) and other genetic studies by collecting sequence data based on a study design suited for the discovery, genotyping and phasing of a comprehensive set of variants. We have previously reported SVs which were not genotyped or phased<sup>21</sup>. Here, we focus on discovery, genotyping and phasing the full spectrum of structural variants to generate a high-quality SV-integrated, haplotype-resolved

reference panel by exploiting two key features of the GoNL project design. First, sufficient coverage (14.5x median base coverage, 38.4x median physical coverage) allows for enhanced genotyping including SVs, as was recently described<sup>19,22,23</sup>. Second, the 769 GoNL individuals originate from 231 trios and 19 families in which twin pairs were included in the offspring generation, yielding family-based haplotypes that are error-free across substantially longer ranges in comparison to statistically phased unrelated individuals<sup>24,25</sup>. In addition to creating a haplotype resolved panel, we report several currently underreported variant types, such as deletions 21 – 100bp in size, complex indels, inversions, mobile element insertions(MEIs), large replacements and insertions of new genomic sequence<sup>26</sup>.

## RESULTS

### Detection of structural variation

We analyzed Illumina whole genome sequencing data derived from 250 parent-offspring trios (769 individuals) from the Dutch population to detect structural variants and indels (non-SNVs) using 12 different variant detection tools representing 5 algorithmic approaches (gapped alignment and split-read mapping, discordant read pair, read depth and *de novo* genome assembly), **Supplementary Table 1** and **Figure 1A**. The results from the different detection tools were combined into a consensus set containing 9 different forms of SVs and indels (simple indels, complex indels, deletions, duplications, inversions, MEIs, interchromosomal breakpoints, novel segments and large replacements). Compared to multiple public data resources<sup>15,26-29</sup>, 13.6% of all indels and 38% of all SVs we report are novel (**Table 1, Supplementary Data Section 3.5**). To show the specificity of our structural variant predictions, we selected a representative set of candidates across all 9 variant types and performed an independent experimental validation using PCR across the variant breakpoints followed by Sanger or Illumina MiSeq sequencing (**Supplementary Data, Supplementary Table 2**). This yielded a confirmation rate for each variant class of between 80% to 97.9% with the exception of inversions (65.4%) which failed to produce a PCR product in 43.5% of the cases (see **Table 1**).

**Deletions and Insertions** We first focused our analysis on deletions and insertions of DNA sequence relative to the reference assembly. This revealed 646,011 short insertions (1-20bp), 1,093,289 short deletions (1-20bp), 24,167 mid-sized deletions (21-100bp) and 19,840 larger deletions (101bp – 1,467kb) of which the majority (99.8%) could be genotyped (**Table1, Figure 1B**). We observed an increased number of deletions with size ranges corresponding to SINE and LINE retrotransposition events (**Supplementary Figure 1**). A substantial fraction of the simple indels (11.5%), mid-sized deletions (21.6%) and 41.9% of larger deletions were novel (**Supplementary Data**). Of the previously known mid-sized deletions, 79.2% were present solely in our previous GoNL release and in no other call set, emphasizing that this size class has been under-investigated.

The consensus set of deletion events were found to be significantly depleted in exonic regions ( $p < 0.5 \times 10^{-4}$ ) and UTRs ( $p < 0.5 \times 10^{-4}$ ) as well as known OMIM disease terms and deletions predicted to result in a loss of function when compared to 10,000 random sets of size matched variants ( $p < 0.5 \times 10^{-4}$ ). Further analyses showed that 11 deletions were in transmission disequilibrium (**Supplementary Table 3**).

**Duplications** We identified 1,738 tandem duplications, 34.6% of which could be successfully genotyped. This low percentage is likely due to the limitations of current computational methods. The majority of the events were novel (84%,  $n=1,458$ ) and contained repetitive elements such as simple repeats ( $n=914$ ) or segmental duplication ( $n=194$ ). A minority of the duplication events ( $n=88$ ) overlapped a RefSeq gene of which 71 affected at least one exon within a gene and 41 events overlapped at least one exon of a gene with an OMIM disease entry (including susceptibility loci and recessive disease genes) (**Table 1**, **Supplementary Figure 4**).

**Complex structural variation** A significant proportion of structural variants cannot be described as simple events. Our data shows that a sizeable fraction of indels (3%,  $n=52,913$ ) represent cases where one multibase segment of DNA (2-10bp) is replaced by another sequence of different length (1-11bp), of which only a minority (17.2%) has previously been described. Furthermore, by combining calls from discordant pair analysis with *de novo* genome assembly, we report 84 inversions and 60 and of which 69 and 46 could be genotyped successfully, respectively. Interestingly, most of these variants were common with average allele frequencies of 22.8% and 32.2%, respectively. Manual curation of interchromosomal events showed that the majority possessed a polyA stretch at the interchromosomal breakpoints and therefore was likely to originate from retrotransposition events. This observation was supported by our orthogonal validations, which showed that 10 of the interchromosomal events contained processed parts of known transcripts and were further characterized as gene retrocopy insertion polymorphisms (GRiP)<sup>30</sup> (**Supplementary Table 4**).

**Mobile element insertions** (MEIs) are a common type of retrotransposition-mediated insertions. In total we identified 13,469 MEIs, making it a frequent form of structural variation (23% of SVs larger than 20bpt). The majority of MEIs could be genotyped (99.7%, n=13,430) and were novel (56%) in comparison to those previously reported (**Supplementary Data**). Non-reference insertions of *Alu* (n=8,670) were the most common form of event followed by L1 (n=4,011), SVA (n=781) and HERV (n=7) insertions. The majority of MEI elements (n=8,136) were located in intergenic regions (**Supplementary Figure 4**), however 49 events were predicted to occur within exonic regions, including validated *AluYa4/5* insertions into coding sequences of *OPRM1*, *METTL4* and *ARHGAP28* as well as a heterozygous *AluYk12* insertion into the last exon of the *EYS* gene, a gene which is involved in autosomal recessive retinitis pigmentosa<sup>31</sup> (**Supplementary Figure 5**). The insertion in *ARHGAP28* was observed in three families, while each of the other three coding MEIs were family-specific events. This suggests that these MEIs in the coding part of the genome are relatively recent and/or deleterious.

**Novel segments** We performed joint *de novo* genome assembly by pooling unmapped and discordantly mapped sequence reads from each family to search genomic segments absent in the genome reference (GRCh37)<sup>32</sup>. Mapping of the resulting contigs to the reference genome allowed us to confirm breakpoints of simple structural variants discovered by alternative approaches. Some of these alignments are consistent with more complex variation types, such as large segmental replacements (**Figure 3, Supplementary Table 5**). Contigs that did not match the genome reference partially or completely were analyzed separately. The size of unmatched sequences ranges from 150bp to 133kb (N50=5.6kb) spanning 22.2Mb of assembled sequence. A large proportion of these sequences (14.4Mb) were considered low quality as they were inconsistently represented by libraries derived from the same individual and restricted to a subset of genomic libraries. Homology searches against a non-redundant NCBI sequence database showed that these segments most likely represent genomic contaminations (**Supplementary Table 6**). The remaining 7.8Mb of sequence (11,115 segments) contained sequence not represented in genome reference GRCh37. Whilst improved GRCh38 assembly places many segments onto the genome map, 4.3Mb of



assembled sequence is still unaccounted for (**Supplementary Table 6**). These segments represented in part difficult to assemble repetitive sequence but also segments thus far uniquely observed in the Dutch population. Interestingly, while not matching GRCh38, eleven segments match UniGene sequences, and include examples of expressed and potentially functional genes. For example, we identified a novel zinc-finger (ZNF) gene, harbored within an insertion on chromosome 19 (**Figure 4**). Although this novel ZNF gene is absent in the human reference (both versions GRCh37 and GRCh38), it has close homology to DNA segments of recently assembled genomes of non-human primates. Mapping of RNA-seq reads from public expression data to a modified human reference genome containing the novel segment showed that the inserted segment codes for a novel spliced ZNF transcript (**Figure 4**).

### **Load and distribution of structural variants**

Cluster analysis was performed to identify genomic hotspots of structural variants (**Supplementary Data**). We confirmed 46 of the 50 deletion hotspots previously reported<sup>33</sup>. Furthermore, when additionally considering duplications, mobile element insertions as well as inversions 13 variant hotspots were identified, of which 4 have previously not been described<sup>33</sup>. Overall each haplotype within the cohort had on average 758kb of sequence affected by simple and complex indels and 4.0Mb by structural variants, amounting to an average of 4.8Mb of sequence affected by non-SNP variants. On average, every individual was affected by 436kb of homozygous simple and complex indels and by 2.4Mb of homozygous structural variants (**Table 1, Supplementary Figure 2**).

### **Rare Variants**

The majority of small deletions were rare (MAF <1%, 50.4% of deletions up to 20bp). Small insertions and mid-sized deletions larger than 20bp displayed a higher allele frequency (MAF < 1%, 39.7% of insertions up to 20bp, and 33.5% of deletions longer than 20bp) (**Figure 2, Supplementary Figure 2**). We stratified each deletion, MEI, short deletion, short insertion and complex indel based on allele frequencies into quartiles. Significantly more exonic events were observed in the first quartile for all variant types tested (**Supplementary Table 7**). We

observed a significant difference in the distribution of indel events occurring within an OMIM gene. More specifically, exonic events affecting OMIM disease genes were more often observed in the first quantile (MAF<0.325%), as were exonic events involved in a KEGG pathway, and those in genes when knocked out in mouse resulting in a phenotype. We observed that rare variants exhibit an excess in deletions larger than 1kb in size and *AluY* insertions. In contrast, deletions that have large overlap with a SINE/LINE repeat occur more frequently in the common events quarter (MAF>42.5%). This could also be due to rare mobile element insertions where the inserted allele has been incorporated in the reference genome assembly (**Supplementary Table 8**). These observations may indicate recent alteration in mutational processes, as well as differences due to negative selection against large deleterious variants.

### Effect of structural variants on gene expression

We obtained gene expression data (based on RNA sequencing data generated from a subset of 115 individuals from the cohort) and tested the effect of structural variants on gene expression (**Supplementary Methods**). The effects of indels, deletions and duplications on gene expression have been previously described<sup>34</sup>. We explored effects of inversions and mobile element insertions on gene expression. Out of 10 inversions and 139 MEIs that overlap exons or core promoters we found two MEIs with a significant effect on gene expression (**Figure 5**). An *AluYa5* insertion was identified in the promoter of the *LCLAT1* gene (**Figure 5A**). Samples which are homozygous for the *AluYa5* insertion display a significantly reduced expression of the *LCLAT1* gene ( $p = 6.87 \times 10^{-9}$ ) (**Figure 5B**). We also identified an *AluYb8* element in the last exon of the *ZNF880* gene. This was associated with differential expression of the last two exons of *ZNF880*, resulting from alternative splicing possibly due to effects of the *Alu* element on RNA secondary structure (**Figure 5C**). These findings show that some of the less studied types of SV, such as MEIs, can impact gene expression both quantitatively and qualitatively.

### Panel construction, imputation and linkage disequilibrium

**Phasing.** We phased all successfully genotyped indels ( $n = 1,792,213$ ) and SVs ( $n=59,298$ ) (**Table 1**) with MVNCall<sup>25</sup> using the Affymetrix 6.0 SNP chip based haplotype scaffolds employed for construction of the reference panel previously described by Francioli *et al.*, 2014<sup>29</sup>.

**Linkage disequilibrium between GWAS SNPs and deletions.** To analyze the extent to which deletions are in linkage disequilibrium (LD; non-random association between alleles) with GWAS SNPs reported in the NHGRI GWAS Catalogue<sup>35</sup>, we tested all pairs of GWAS SNPs and deletions with a distance of at most 1MB ( $n=55,250$ ) for being in LD. Of these pairs, 14,003 (25.40%) showed statistically significant LD (based on Fisher's exact test, and correction with Benjamini-Hochberg's false discovery rate). To assess whether this relatively high percentage of significant associations among the GWAS-SNP pairs is related to the GWAS status of the SNPs, we performed the same experiment on similar SNPs (applying a sampling technique previously described<sup>36</sup>) that were not associated through GWAS (**Online Methods**). We observed a significantly greater number GWAS SNP-deletion pairs (25.4%) in LD than of non-GWAS SNP-deletion pairs (19.1%,  $sd=0.2$ ) (see **Supplementary Data**), revealing that deletions deserve attention in studies of common genetic disorders and might be underlying some of the current GWAS SNP hits (**Supplementary Figure 7 and 8**). To test this hypothesis further, we filtered all GWAS SNP-deletion pairs for those in high LD ( $r^2 \geq 0.8$ ), resulting in 115 pairs (**Supplementary Table 9**). Among these pairs, an exonic inframe deletion (rs148114931) of 9 codons in *APOBR* appears twice, linking it to SNP rs151181 which has been associated to Crohn's disease<sup>37</sup> and SNP rs26528 associated to inflammatory bowel disease<sup>38</sup>. Another deletion affected the UTR of *ITGA11* which had been linked to major depressive disorder<sup>39</sup>. In addition, 61 intronic deletions were found to be in LD with SNPs previously associated to disease. In particular, due to the rigorous FDR correction applied, our catalog of 115 significant GWAS SNP-deletion pairs provides strong initial evidence for further studies (**Supplementary Table 10**).

**Tag SNPs for SVs.** We further compiled a list of 8,854 SNP-SV pairs (based on MEI's and novel genomic segments) in high LD ( $r^2 > 0.8$ ) on the Affymetrix 6.0 SNP chip and/or GWAS SNPs which tag common deletions ( $MAF > 4\%$ ) present in our panel. Next to deletions, other

types of structural variants might underlie human traits. Thus, an additional 76 GWAS SNPs were in high LD ( $r^2 \geq 0.8$ ) with one of 30 polymorphic MEI insertion or 43 new genomic segments (**Supplementary Data, Supplementary Table 9**). We expect that a significant part of these SVs might contribute to traits studied by GWAS studies.

**Imputing structural variants.** Genotype imputation, the prediction of missing genotypes based on a reference panel, has been very successful in boosting the power of GWAS, enabling meta studies, and improving the chances of identifying causal variants<sup>40</sup>. The value of the GoNL panel to robustly impute SNPs and indels has previously been shown<sup>2</sup>. We extend this concept and demonstrate that our SV-integrated panel allows for accurate imputation of SVs by imputing structural variants in an independent group of individuals based solely on their SNP genotype status (see **Figure 6** for a schematic overview). We genotyped all complex indels, deletions, duplications, inversions, and MEIs we found (**Figure 6**, Step 1) in two independently sequenced Dutch genomes. We extracted all SVs that could be genotyped with a confidence of 0.999 (Step 2, see **Online Methods**) in these individuals to create a set of gold standard genotypes. Gold standard genotype counts for each SV class are shown in **Figure 7A**. SNP genotypes were filtered to only include those SNPs present on an Affymetrix 6.0 chip (Step 3), to simulate an array-based assay. Based on the SNP genotypes obtained and the GoNL reference panel we used IMPUTE2 to impute SV genotypes (Step 4, see **Online Methods**) to compare with the gold standard call. After imputation, SVs can optionally be filtered based on the genotype likelihoods (GLs). Here we document the performance for six different cutoffs (0.33, 0.75, 0.9, 0.95, 0.99, and 0.999). Step 5 thus only retains genotype calls that meet the respective threshold being tested. The quality of the remaining imputed genotypes was determined by the fraction of imputed genotypes matching with the gold standard genotypes (concordance = squared correlation; see **Supplementary Note, Section 9** for a formal definition). We refer to its inverse (i.e. one minus concordance) as discordance. The GL threshold influences the tradeoff between discordance and the fraction of genotypes missing due to this filter (**Figure 7B**). We find that more stringent filtering leads to an increase in concordance, demonstrating that the genotype likelihoods are meaningful. Specifically, employing the most stringent GL filter tested (at a

level of 0.999) leads to only a moderate loss of 8.6% to 21.6% of genotypes imputed, depending on the variant type, while the discordance drops by 83% (from 2.9% to 0.5%) for duplications, by 71% (from 4.2% to 1.2%) for deletions, by 67% (from 6.9% to 2.3%) for MEIs, by 42% (from 14.2% to 8.2%) for inversions, and by 38% (from 10.5% to 6.5%) for complex indels. Based on **Figure 7B**, we consider a threshold of 0.95 (red circle) a good tradeoff and report these results henceforth. With this setting, only 7.5% of all SVs are omitted, while the concordance is excellent; 88% for inversions, 92.4% complex indels, and 96.5% MEIs 98% for deletions and 99.1% for duplications. For the more common SV classes with more than 1,000 genotype calls (**Figure 7A**), namely complex indels, deletions, and MEIs, we further stratified performance based on genotypes (**Supplementary Figure 9**) and on allele frequency. We observed that a higher MAF leads towards a higher discordance in genotypes across all three SV classes (**Figure 7C**). This is driven by the fact that the vast majority of the rare variants in the GoNL reference panel are not found in these samples and is thus easy to impute correctly as homozygous reference. To investigate how well the rare allele could be imputed, we repeated the analysis restricted to only gold standard genotypes that contain one copy of the rare allele (that is, genotypes homozygous for the major allele are discarded), see **Figure 7D** and **Supplementary Figure 10**. Only imputation of rare SV (or reference) alleles with panel frequencies below 5% leads to considerable losses in imputation quality, while imputation performance is excellent for higher MAFs (**Supplementary Figure 11 and 12**).

## DISCUSSION

The past few years have seen a remarkable progress in human genome sequencing studies, which has greatly improved our understanding of human genome variation<sup>3,14,15,17-19,29,33</sup>. These projects differ, often substantially, in terms of sample selection and sequence coverage. For example, to capture global diversity, the 1000 Genomes Project selected 2,504 unrelated individuals from 26 populations and largely relied on the discoveries from low coverage whole genome data<sup>14,15</sup>. As a result a large proportion of common variants with population frequency greater than 1% have been discovered across multiple populations. In contrast, the UK10K project combined low coverage whole-genome with high coverage exome sequencing approaches to identify rare variants associated with various genetic traits<sup>18</sup>.

We exploit two features of the GoNL study design to create an SV-integrated reference. First, an elevated coverage allows for enhanced genotyping of SV's<sup>19,22,23</sup>. Second, the family-based design aids in establishing error-free haplotypes across significantly longer ranges than achievable based on unrelated individuals<sup>19,20</sup>. Combining these two features yields a wealth of high quality SV-integrated haplotypes, which we have corroborated by imputation experiments. In addition, the family design has facilitated analysis of variant transmission within a single generation. We have also been able to compile a list of SV's that are in high LD with disease associated SNPs which are highly unlikely to be false discoveries based on additional statistical analysis.

Our reference panel spans a wide range of variant classes, many of which have previously not been extensively reported, such as complex indels and medium-size SVs (affecting between 21 and 100 nucleotides). In particular medium-sized SVs are sometimes considered a blind spot in short read based variant discovery. This required method development for both discovery and genotyping, as well as clean sequencing library protocols. Furthermore we report a large collection of new genomic segments, representing several million bases missing from the genome reference.

Downstream analysis of the variants provided insights into the mutational dynamics as well as the consequences of selection processes affecting structural variants. We show that the distribution and predicted functional impact of variants differs significantly between rare and common variants. Whilst previous studies<sup>41</sup> have demonstrated the effects of polymorphic deletions on gene expression, we here identified the effects on gene expression of additional forms of structural variation such as MEIs.

The evolution of high-throughput sequencing technologies, coupled with advances in data analysis, has leveraged substantial progress in variant detection in next-generation short-read data. Every new study has fostered our understanding about the human genome. Nonetheless, there is still considerable room for improvement<sup>26</sup>. Difficulties remain in capturing large and complex structural variants, especially those in repetitive regions. Evolving third-generation single molecule and long read sequencing, and further methodological advances such as global genome map technology, may further improve the discovery, genotyping and phasing of structural variants. Given present-generation technology, our approaches and the resulting reference panel provide both an advanced toolkit and a powerful resource, with great potential to decisively enhance genome-wide association and personalized genomics studies.

## **Acknowledgements**

The GoNL Project is funded by the Biobanking and Biomolecular Research Infrastructure (BBMRI-NL), which is financed by the Netherlands Organization for Scientific Research (NWO project 184.021.007). BBMRI-NL funded Kai Ye for validation experiments, CP2011-36. The Netherlands Organization for Scientific Research (NWO) has funded J. Hehir-Kwa through Veni grant 016.166.015 and A. Schönhuth through Vidi grant 639.072.309.

## **Data Access**

Sequence data have been deposited at the European Genome-phenome Archive (EGA), which is hosted by the European Bioinformatics Institute (EBI), under accession number EGAS00001000644.



## ONLINE METHODS

### Sample Collection and Data Generation

Samples were collected as outlined in Boomsma *et al.* (2013)<sup>14</sup> and sequenced using the Illumina HiSeq 2000 platform using 91bp paired-end reads<sup>15</sup>. Data was mapped to the UCSC human reference genome build 37 using BWA 0.5.9-r16 and quality control was performed as previously described<sup>15</sup>.

### Structural Variation Discovery

We used 13 different algorithms for the discovery of structural variants, which use four different general approaches: split-read mapping (SR), (discordant) read pairs (DP), read depth (RD), de novo assembly (AS), and combinations thereof, as shown in **Figure 1A**. Details about how the individual methods were run are provided in the **Supplementary Note**.

### Generating a Consensus Call Set

After creation of the algorithm specific calls sets a consensus set of indels and SVs were made for each to the SV types (indels, deletions, insertions, duplications, inversions, interchromosomal events, and mobile element insertions). Events were merged per variant type using an algorithm-aware merging strategy (**Supplementary Table 1**). A consensus region was defined identified by 2 different detection strategies (for example split read and discordant read pair, see **Supplementary Figure 2** for the contributions of individual strategies for deletion detection, stratified by AF and event length), and the boundaries of the event were determined by the algorithm with the highest breakpoint accuracy (as determined by the calling strategy) in combination with a 50% reciprocal overlap. For variants 20bp and smaller in size an exact overlap was used, with support from at least two different methods.

### Structural Variation Validation

Validation was performed using PCR amplification of breakpoint junctions, and subsequence sequencing of the PCR products via Sanger or MiSeq sequencing. The validation set consisted of 96 of each indels, deletions 21 – 100bp in size, MEIs, large replacements,

complex indels and novel segments, as well as 48 large deletions, 48 duplications, 76 inversions and 42 interchromosomal breakpoints (see **Supplementary Data**).

### **Structural Variation Genotyping and Phasing**

To genotype SVs, we used GATK's HaplotypeCaller for complex indels, MATE-CLEVER for deletions, Mobster for MEIs, and Delly for inversions, duplications, and translocations. Details on how each tool was run are collected in the **Supplementary Note**. For phasing, we used the same haplotype scaffolds as previously described<sup>15</sup> to phase SVs onto the already phased sets of SNPs and indels. The scaffold contains sites present on Omni2.5M chips. Refer to the supplement of Francioli *et al.*<sup>15</sup>, Section 12, for details on how it was created. Phasing was done using MVNcall version 1.1<sup>19</sup>. We used the genotype likelihoods (GLs) reported by the genotyping tools described above. Before phasing, the GLs were regularized so as to avoid too low probabilities as detailed in the **Supplementary Note**.

### **GWAS SNP Permutation Test**

For every GWAS SNP-deletion pair, we randomly selected a non-GWAS SNP-deletion pair that was similar in terms of potentially confounding variables, see **Supplementary Note** for those variables. We then applied Fisher's exact test and the FDR control procedure on the matched non-GWAS SNP-deletion set and recorded the percentage of statistically significant pairs. This sampling procedure was repeated 103 times. The samples were found to have a mean of 19.14% and a standard deviation of 0.20, against the percentage of 25.40% for the GWAS SNPs (**Supplementary Figure 8**), see Supplementary Material, Section 7.1, for further details.

### **Structural Variation Imputation**

SV genotyping of two independent Dutch individuals was done using the same pipeline as for genotyping SVs in the GoNL panel (see **Supplementary Note**), that is, GATK/HaplotypeCaller was used for complex indels, MATE-CLEVER for deletions, DELLY for duplications and inversions, and Mobster for MEIs. Genotype likelihoods (GLs) provided by these tools were used to determine the gold standard set, requiring a probability of 0.999

of the genotype being correct for all call types except for MEIs, where we used 0.85 account for differently calibrated GLs. For imputation of SV genotypes based on SNP genotypes and the GoNL panel, we used IMPUTE2<sup>39</sup>. Therefore, we first used SHAPEIT2<sup>40</sup> for first phasing all SVs with the SNPs using the GoNL panel. Refer to the for **Supplementary Note Section 9** details such as command line arguments. Note that phasing genetic variants using SHAPEIT2 before imputing genotypes with IMPUTE2 follows best-practice recommendations (see IMPUTE2 [https://mathgen.stats.ox.ac.uk/impute/impute\\_v2.html](https://mathgen.stats.ox.ac.uk/impute/impute_v2.html)). The expected discordance between true and imputed genotype is based on comparing the probability distribution over the three different genotypes provided by IMPUTE2 for the imputed genotypes on the one hand, and the probability distribution provided by the read-based genotyping tools on the other hand, see the **Supplementary Note Section 9** for details and definitions. We refer to the expected value of the discordance just as “discordance” in the main text and we refer to 1-discordance as concordance.

## REFERENCES

1. Consortium, G.o.t.N. Whole-genome sequence variation, population structure and demographic history of the Dutch population. *Nature genetics* **46**, 818-25 (2014).
2. Deelen, P. *et al.* Improved imputation quality of low-frequency and rare variants in European samples using the 'Genome of The Netherlands'. *Eur J Hum Genet* **22**, 1321-6 (2014).
3. International HapMap, C. The International HapMap Project. *Nature* **426**, 789-96 (2003).
4. International HapMap, C. *et al.* Integrating common and rare genetic variation in diverse human populations. *Nature* **467**, 52-8 (2010).
5. Conrad, D.F. *et al.* Origins and functional impact of copy number variation in the human genome. *Nature* **464**, 704-12 (2010).
6. de Cid, R. *et al.* Deletion of the late cornified envelope LCE3B and LCE3C genes as a susceptibility factor for psoriasis. *Nat Genet* **41**, 211-5 (2009).
7. Fanciulli, M. *et al.* FCGR3B copy number variation is associated with susceptibility to systemic, but not organ-specific, autoimmunity. *Nat Genet* **39**, 721-3 (2007).
8. Girirajan, S. *et al.* Relative burden of large CNVs on a range of neurodevelopmental phenotypes. *PLoS Genet* **7**, e1002334 (2011).
9. Koolen, D.A. *et al.* Genomic microarrays in mental retardation: a practical workflow for diagnostic applications. *Hum Mutat* **30**, 283-92 (2009).
10. Pinto, C.A. & Haff, R.F. Experimental infection of gibbons with rhinovirus. *Nature* **224**, 1310-1 (1969).
11. Hurles, M.E., Dermitzakis, E.T. & Tyler-Smith, C. The functional impact of structural variation in humans. *Trends in Genetics* **24**, 238-245.
12. Feuk, L., Carson, A.R. & Scherer, S.W. Structural variation in the human genome. *Nat Rev Genet* **7**, 85-97 (2006).
13. Genomes Project, C. *et al.* A global reference for human genetic variation. *Nature* **526**, 68-74 (2015).
14. Sudmant, P.H. *et al.* Global diversity, population stratification, and selection of human copy-number variation. *Science (New York, N.Y.)* **349**, aab3761 (2015).
15. Sudmant, P.H. *et al.* An integrated map of structural variation in 2,504 human genomes. *Nature* **526**, 75-81 (2015).
16. Sidore, C. *et al.* Genome sequencing elucidates Sardinian genetic architecture and augments association analyses for lipid and blood inflammatory markers. *Nat Genet* **47**, 1272-1281 (2015).
17. Besenbacher, S. *et al.* Novel variation and de novo mutation rates in population-wide de novo assembled Danish trios. *Nat Commun* **6**, 5969 (2015).
18. Consortium, U.K. *et al.* The UK10K project identifies rare variants in health and disease. *Nature* **526**, 82-90 (2015).
19. Wong, L.P. *et al.* Deep whole-genome sequencing of 100 southeast Asian Malays. *Am J Hum Genet* **92**, 52-66 (2013).
20. Boomsma, D.I. *et al.* The Genome of the Netherlands: design, and project goals. *Eur J Hum Genet* (2013).
21. Francioli, L.C. *et al.* Genome-wide patterns and properties of de novo mutations in humans. *Nat Genet* **47**, 822-6 (2015).
22. Chu, C., Zhang, J. & Wu, Y. GINDEL: accurate genotype calling of insertions and deletions from low coverage population sequence reads. *PLoS One* **9**, e113324 (2014).
23. Marschall, T., Hajirasouliha, I. & Schonhuth, A. MATE-CLEVER: Mendelian-inheritance-aware discovery and genotyping of midsize and long indels. *Bioinformatics* **29**, 3143-50 (2013).
24. Marchini, J. *et al.* A comparison of phasing algorithms for trios and unrelated individuals. *Am J Hum Genet* **78**, 437-50 (2006).
25. Menelaou, A. & Marchini, J. Genotype calling and phasing using next-generation sequencing reads and a haplotype scaffold. *Bioinformatics* **29**, 84-91 (2013).
26. Chaisson, M.J.P. *et al.* Resolving the complexity of the human genome using single-molecule sequencing. *Nature* **517**, 608-611 (2015).
27. Sherry, S.T. *et al.* dbSNP: the NCBI database of genetic variation. *Nucleic Acids Res* **29**, 308-11 (2001).

28. MacDonald, J.R., Ziman, R., Yuen, R.K., Feuk, L. & Scherer, S.W. The Database of Genomic Variants: a curated collection of structural variation in the human genome. *Nucleic Acids Res* **42**, D986-92 (2014).
29. Genome of the Netherlands, C. Whole-genome sequence variation, population structure and demographic history of the Dutch population. *Nat Genet* **46**, 818-25 (2014).
30. Schrider, D.R. *et al.* Gene copy-number polymorphism caused by retrotransposition in humans. *PLoS Genet* **9**, e1003242 (2013).
31. Collin, R.W. *et al.* Identification of a 2 Mb human ortholog of *Drosophila* eyes shut/spacemaker that is mutated in patients with retinitis pigmentosa. *Am J Hum Genet* **83**, 594-603 (2008).
32. Luo, R. *et al.* SOAPdenovo2: an empirically improved memory-efficient short-read de novo assembler. *Gigascience* **1**, 18 (2012).
33. An integrated map of genetic variation from 1,092 human genomes. *Nature* **491**, 56-65 (2012).
34. Huang, J. *et al.* eQTL mapping identifies insertion- and deletion-specific eQTLs in multiple tissues. *Nat Commun* **6**, 6821 (2015).
35. Welter, D. *et al.* The NHGRI GWAS Catalog, a curated resource of SNP-trait associations. *Nucleic Acids Res* **42**, D1001-6 (2014).
36. Maurano, M.T. *et al.* Systematic localization of common disease-associated variation in regulatory DNA. *Science (New York, N.Y.)* **337**, 1190-5 (2012).
37. Franke, A. *et al.* Genome-wide meta-analysis increases to 71 the number of confirmed Crohn's disease susceptibility loci. *Nat Genet* **42**, 1118-25 (2010).
38. Jostins, L. *et al.* Host-microbe interactions have shaped the genetic architecture of inflammatory bowel disease. *Nature* **491**, 119-24 (2012).
39. Investigators, G., Investigators, M. & Investigators, S.D. Common genetic variation and antidepressant efficacy in major depressive disorder: a meta-analysis of three genome-wide pharmacogenetic studies. *Am J Psychiatry* **170**, 207-17 (2013).
40. Marchini, J. & Howie, B. Genotype imputation for genome-wide association studies. *Nat Rev Genet* **11**, 499-511 (2010).
41. Stranger, B.E. *et al.* Relative impact of nucleotide and copy number variation on gene expression phenotypes. *Science (New York, N.Y.)* **315**, 848-53 (2007).

## TABLES

**Table 1:** Characteristics of the consensus indel and structural variants set.

## FIGURES

**Figure 1.** (A) Overview of methods used for SV detection, genotyping and phasing within the GoNL project. (B) Structural variation consensus set, consisting of large duplications (outer ring), deletions larger than 100bp (light red), chromosomes, insertions (triangles), mid-sized deletions (21-100bp), small deletions (less than 20bp) (dark red) and complex indels (purple). Heatmaps display the *ALU* insertions, L1 and SVA. Inversions are indicated by black arcs in the centre of the plot, and interchromosomal break points (colored based on the source chromosome).

**Figure 2.** Number of simple and complex indels, mobile element insertions (MEIs) and deletions (stratified by length). Grey bars correspond to total counts, whereas colored (blue to violet) bars give counts stratified into four bins by allele frequency quartiles (Q1 to Q3).

**Figure 3.** Example of a large replacement within the *KRBOX4* gene. The plot depicts the coverage profile of whole genome sequencing reads from a GoNL sample with a homozygous replacement. The lack of coverage in the last exon of *KRBOX4* is coinciding with the position of the replacement. The breakpoint junctions of the replacement are indicated in the panel underneath the coverage plot.

**Figure 4.** Identification and expression of a novel ZNF gene. (A) A Geuvadis RNA-sequencing dataset (ERR188316) was mapped to the human reference genome, which was extended with a new genomic segment inserted in chr 19 (bp 21,252,967). The plot shows RNA expression and split-read mappings across the novel ZNF gene present on this new genomic segment. (B) Protein domain structure of the novel ZNF gene as determined using NCBI Conserved Domain Search. (C) Neighbor-joining tree built from alignment of protein sequences homologous to the novel ZNF gene. Values at the nodes indicate bootstrap support of each group.

**Figure 5.** Effects of MEIs on gene expression. (A) Schematic picture indicating an *AluYa5* insertion in the promoter region of *LCLAT1*. (B) *LCLAT1* gene expression in blood from GoNL individuals who are heterozygous (het) or homozygous (hom) for the *AluYa5* insertion. (C) RNA expression effects of an *AluYb8* insertion in the last exon of *ZNF880*. The presence of the *AluYb8* element results spliced transcripts, which preferentially contain the last exon, while the before last exon is skipped (upper panel). The reverse effect is seen in the absence of the *AluYb8* insertion (lower panel).

**Figure 6.** Schematic overview of the imputation experiment. Haplotypes are represented by thin grey bars, whereas diploid chromosomes with genotype calls are indicated by thick grey bars. Processing steps are shown in blue, with numbers (in black circles) for being referenced in the main text.

**Figure 7.** Imputation results for different SV types. (A) Histogram on the number of gold standard genotype calls per SV class. (B) Relationship between discordance and fraction of missing genotypes when altering the genotype likelihood (GL) threshold used for filtering the imputed genotypes, ranging from 0.33 (=no filter) to 0.999 across SV classes. Thresholds used for further analyses, including panels (C) and (D), are circled in red. Increasing the minimum GL results in fewer discordant genotypes but increases the number of missing genotypes. Imputation of inversions had the highest rate of discordance and missing genotypes, whereas the tandem duplications and deletions had lower rates of discordant and missing genotypes for those events with a high GL. (C) Discordance rates for deletions, complex indels and MEIs stratified by minor allele frequencies for 20 bins (width=0.025). Bin boundaries are indicated by grey lines. The number of calls per bin are shown by dashed lines. (D) Same as (C), but restricted calls where the gold standard genotype contains at least one copy of the rare allele.

## Supplementary Figures

**Supplementary Figure 1.** Repeat content of deletions identified in the GoNL dataset.

**Supplementary Figure 2.** Deletions have been stratified into four bins based on AF quartiles

**Supplementary Figure 3.** Histograms showing the distribution of the number of affected base pairs per haplotype.

**Supplementary Figure 4.** The gene components affected by structural variations in the consensus set.

**Supplementary Figure 5.** Example of MEI in coding sequence of EYS.

**Supplementary Figure 6.** The percentage of SNP-deletion pairs deemed statistically significant.

**Supplementary Figure 7.** The percentage of SNP-deletion pairs deemed statistically significant when varying the allele frequency and distance thresholds.

**Supplementary Figure 8.** Distribution of imputed genotypes per ground truth genotype and per SV type.

**Supplementary Figure 9.** Expected discordance rate stratified by minor allele frequency for different calling thresholds.

**Supplementary Figure 10.** Expected discordance rate stratified by minor allele frequency for different calling thresholds.

**Supplementary Figure 11:** Distribution of imputed genotypes per gold standard genotype and per SV type based on rare alleles.

## Supplementary Tables

**Supplementary Table 1:** Merging strategy for different detection algorithms to create the consensus set of structural variants.

**Supplementary Table 2:** Validations performed for structural genomic variations

**Supplementary Table 3:** Deletions in transmission disequilibrium.

**Supplementary Table 4:** Overview of all interchromosomal structural variations.

**Supplementary Table 5:** Large replacements identified via *de novo* assembly

**Supplementary Table 6:** Overview of classes of novel genomic segments identified in the GoNL dataset.

**Supplementary Table 7:** Allele Frequency vs Functional Impact

**Supplementary Table 8:** Allele frequency distribution (quantile-based) of MEI deletions and insertions

**Supplementary Table 9:** List of 115 GWAS hitSNPs significantly in LD with GoNL deletions.

**Supplementary Table 10:** SNPs in LD with GoNL SVs.



**Figure 1A Overview of methods used for SV detection, genotyping and phasing within the GoNL project.**

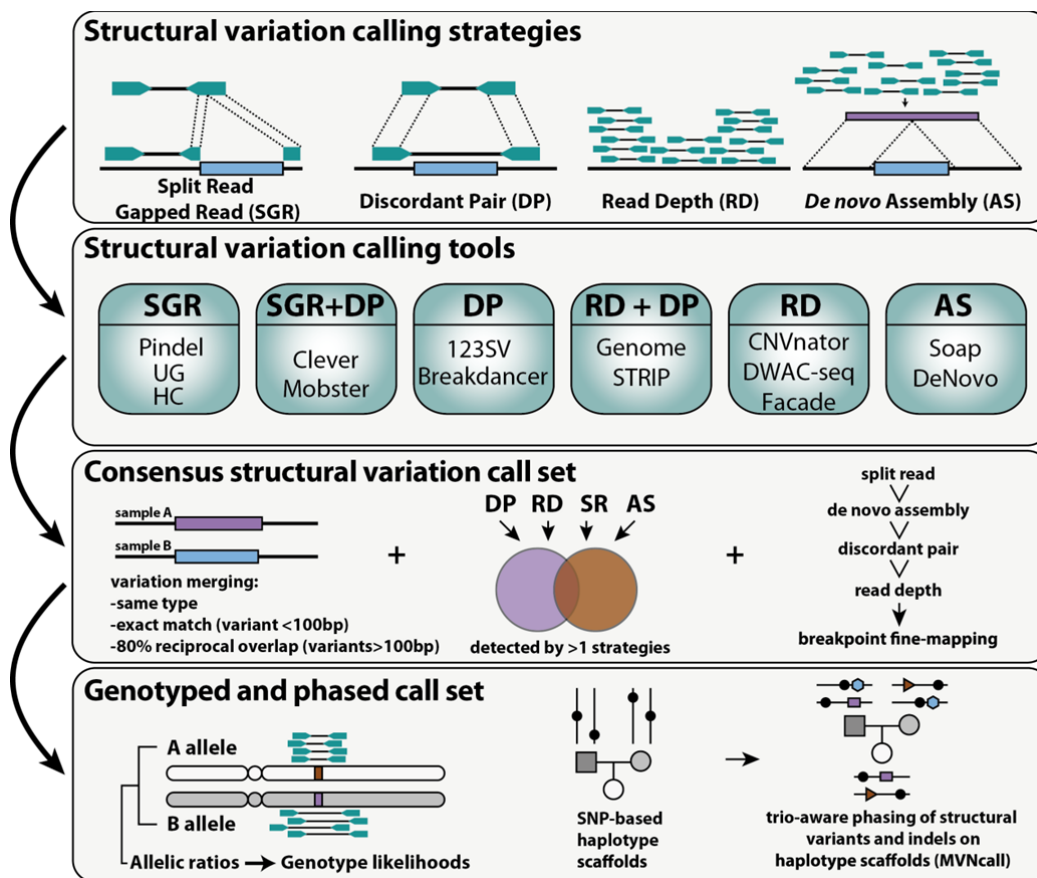

**Figure 1B**

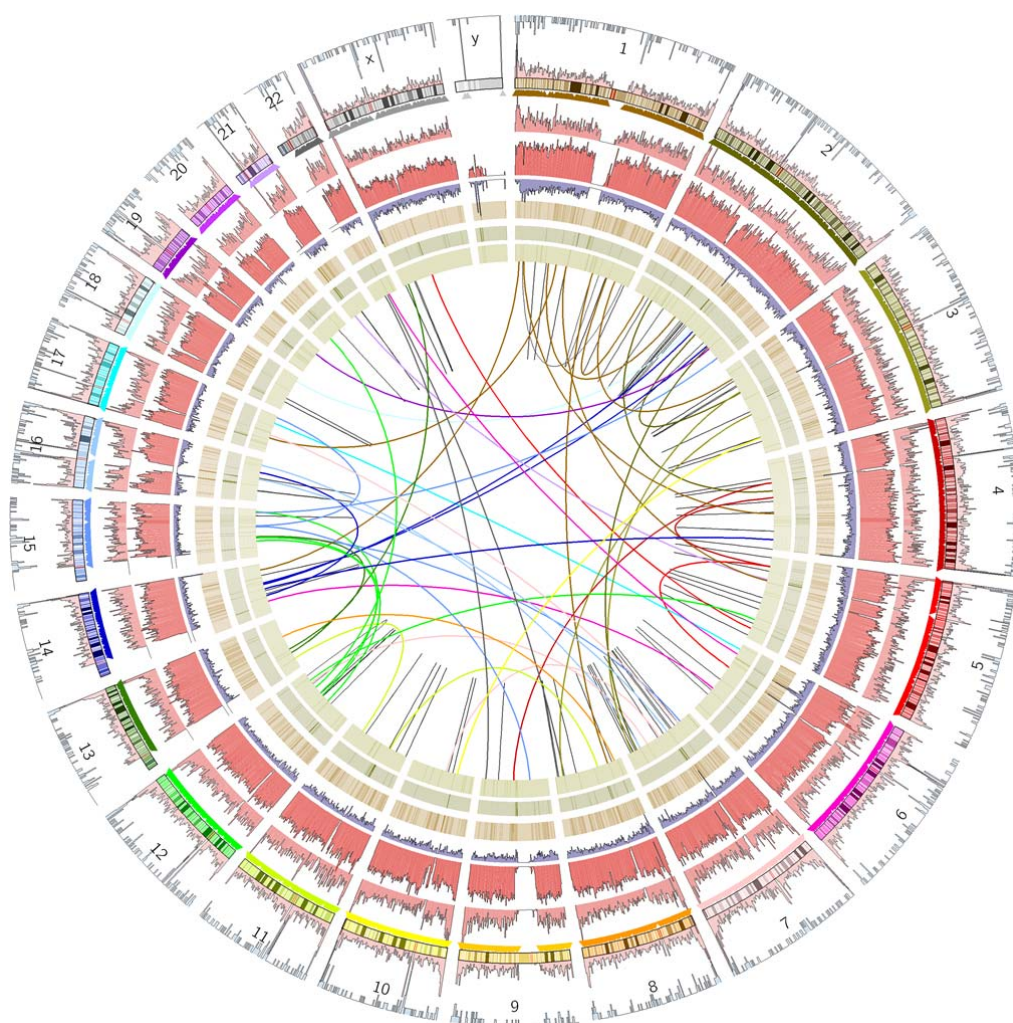

Figure 2

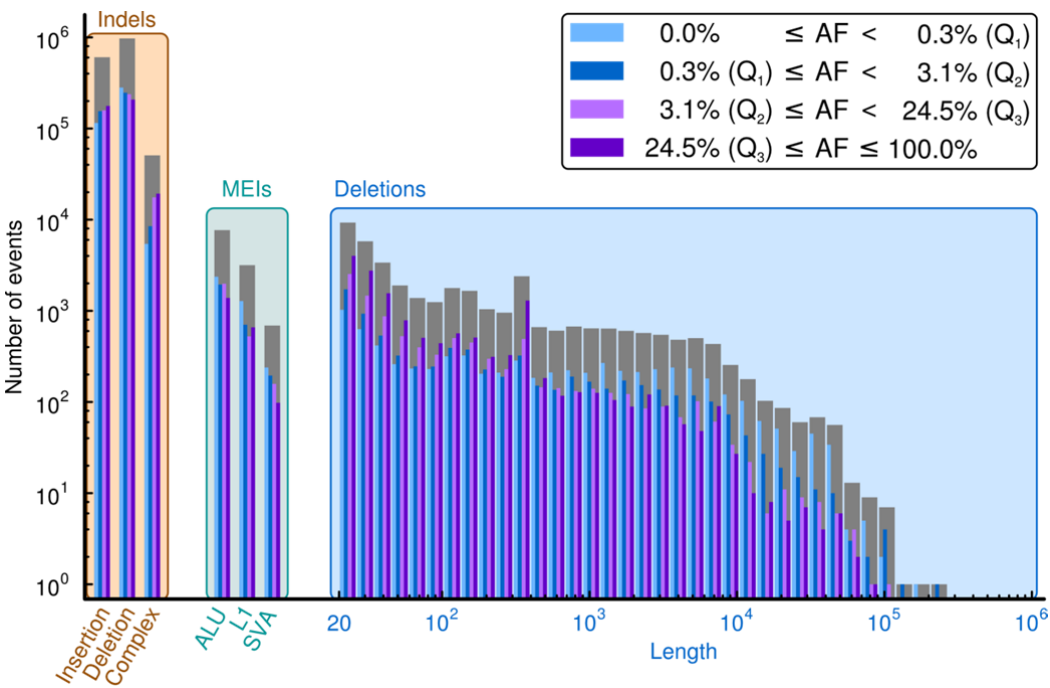

Figure 3

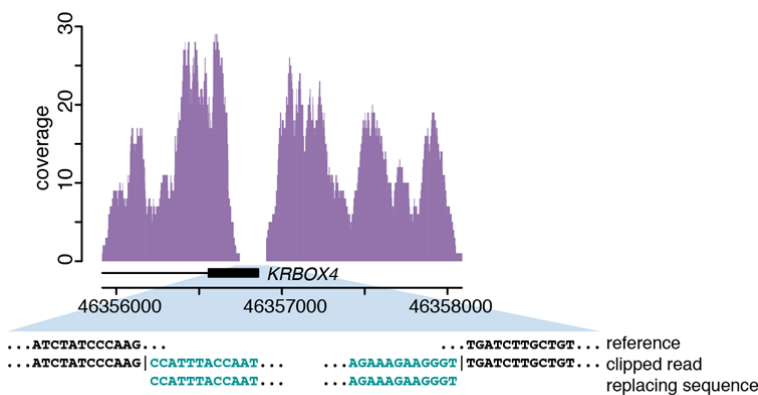

**Figure 4**

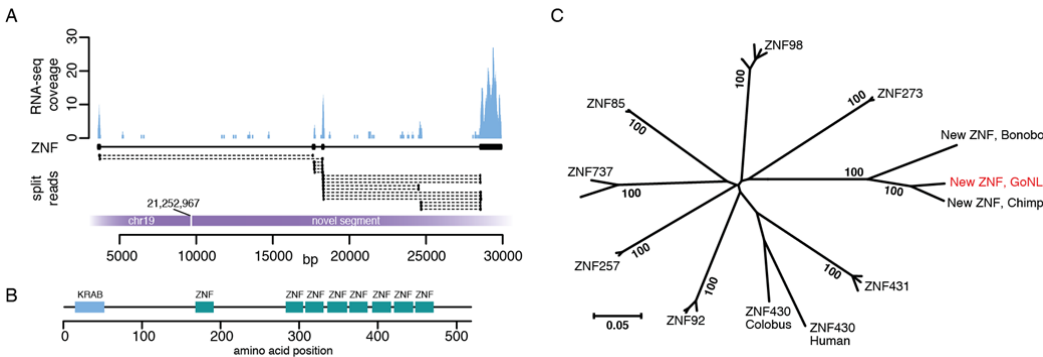

**Figure 5**

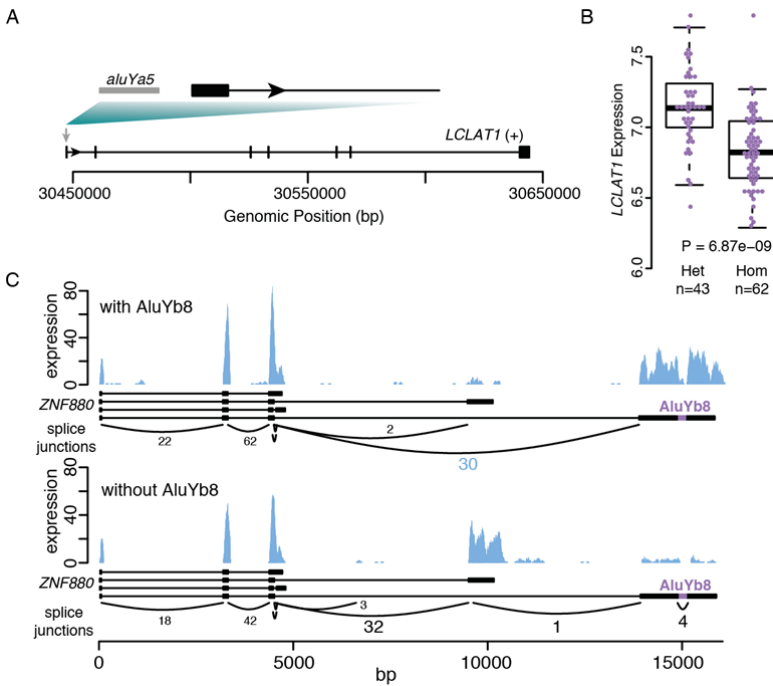

Figure 6

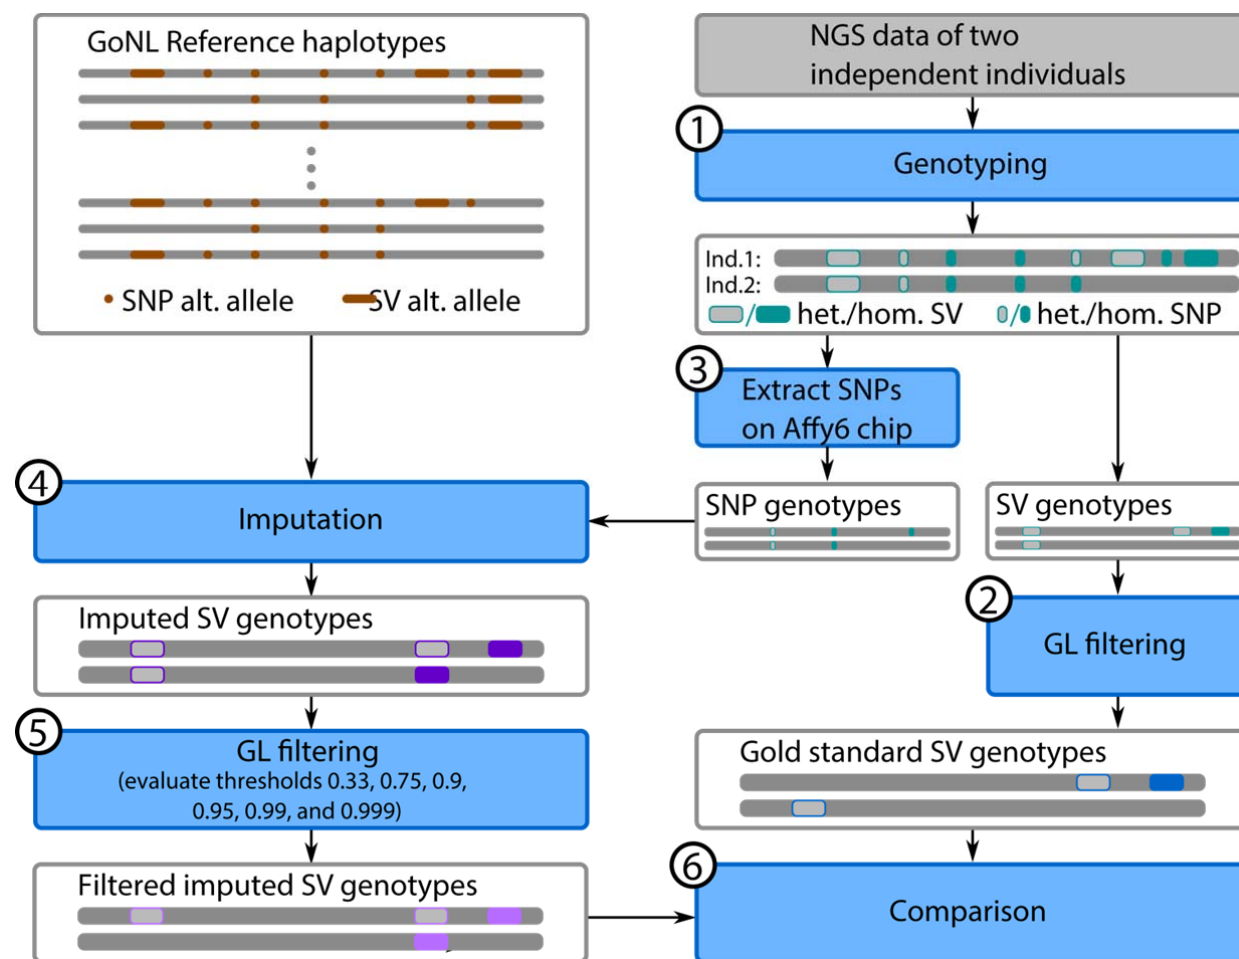

**Figure 7**

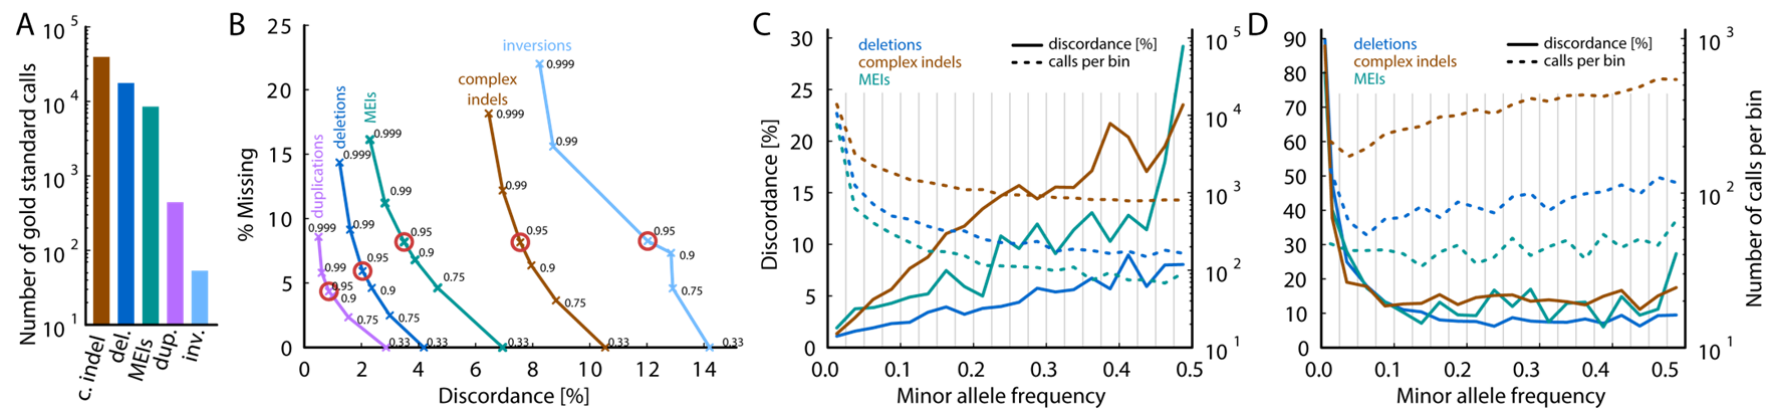

**Table 1:** Characteristics of the consensus indel and structural variants set.

| Type                                   | Number    | Genotyped | Validation rate (%) | Novel (%) | Rare (MAF<1%) | Low freq (1<=MAF<5%) | Common (MAF >= 5%) | Mean Length | Length Stdev. | Load (avg. bp/haplotype) | Load (avg. homozygous/genome) |
|----------------------------------------|-----------|-----------|---------------------|-----------|---------------|----------------------|--------------------|-------------|---------------|--------------------------|-------------------------------|
| Indel                                  | 1,739,300 | 1,739,300 | 98                  | 11.5      | 46.5%         | 15.5%                | 38.1%              | 2.5         | 2.8           | 633765.5                 | 363862.0                      |
| Complex Indel                          | 52,875    | 52,875    | 80                  | 82.8      | 25.7%         | 17.5%                | 56.8%              | 9.6         | 9.0           | 123765.9                 | 72082.9                       |
| Deletion 21-100bp                      | 24,167    | 22,914    | 98                  | 21.6      | 21.5%         | 14.6%                | 63.9%              | 35.9        | 17.4          | 230838.6                 | 160802.6                      |
| Deletion >100bp                        | 19,840    | 17,636    | 93                  | 41.9      | 49.2%         | 13.3%                | 37.5%              | 3908.2      | 21507.3       | 3099740.4                | 1928806.6                     |
| Mobile Element Insertion               | 13,469    | 13,430    | 96                  | 55.9      | 54.9%         | 13.6%                | 31.6%              | n/a         | n/a           | n/a                      | n/a                           |
| Duplication                            | 1,738     | 601       | 85                  | 83.9      | 82.5%         | 8.2%                 | 9.3%               | 61322.2     | 947459.0      | 482059.4                 | 169250.2                      |
| Inversion                              | 84        | 69        | 65                  | 29.8      | 21.7%         | 15.9%                | 62.3%              | 3047390.1   | 23882994.1    | 154510.4                 | 101262.7                      |
| Interchromosomal events                | 60        | 46        | 83                  | n/a       | 39.1%         | 10.9%                | 50.0%              | n/a         | n/a           | n/a                      | n/a                           |
| Novel Segments                         | 7,578     | n/a       | 90                  | n/a       | n/a           | n/a                  | n/a                | 561.3       | 2000.8        | n/a                      | n/a                           |
| Large Replacements: Replaced segments  | 281       | n/a       | 98                  | n/a       | n/a           | n/a                  | n/a                | 6053.5      | 27970.3       | n/a                      | n/a                           |
| Large Replacements: Replacing segments | 281       | n/a       | 98                  | n/a       | n/a           | n/a                  | n/a                | 1272.4      | 2018.9        | n/a                      | n/a                           |
